# Supplementary material for: Indonesian Euphorbiaceae: Ethnobotanical Survey, In Vitro Antibacterial, Antitumour Screening and Phytochemical Analysis of Euphorbia atoto
Source: MDPI journal article supplement (doi:10.3390/plants12223836), 2023-11-13
Supplement: s1 [file s1]

## SUPPORTING INFORMATION

# Indonesian Euphorbiaceae: Ethnobotanical Survey, In Vitro Antibacterial, Antitumour Screening and Phytochemical Analysis of *Euphorbia atoto*

Dyke Gita Wirasisya <sup>1,2</sup>, Annamária Kincses <sup>1</sup>, Livia Vidács <sup>1</sup>, Nikoletta Szemerédi <sup>3</sup>, Gabriella Spengler <sup>3</sup>, Anita Barta <sup>1</sup>, I Gde Mertha <sup>4</sup> and Judit Hohmann <sup>1,5,\*</sup>

<sup>1</sup> Institute of Pharmacognosy, University of Szeged, H-6720 Szeged, Hungary; dykegita\_w@unram.ac.id (D.G.W.); kincses.annamaria@szte.hu (A.K.); vidacs.livia@gmail.com (L.V.); bartaanita96@gmail.com (A.B.)

<sup>2</sup> Department of Pharmacy, Faculty of Medicine, University of Mataram, Mataram 83126, Indonesia

<sup>3</sup> Department of Medical Microbiology, Albert Szent-Györgyi Health Center and Albert Szent-Györgyi Medical School, University of Szeged, H-6725 Szeged, Hungary; szemeredi.nikoletta@med.u-szeged.hu (N.S.); spengler.gabriella@med.u-szeged.hu (G.S.)

<sup>4</sup> Department of Biology Education, Faculty of Teacher Training and Education, University of Mataram, Mataram 83126, Indonesia; gdemerth19@gmail.com

<sup>5</sup> ELKH-USZ Biologically Active Natural Products Research Group, University of Szeged, H-6720 Szeged, Hungary

\* Correspondence: hohmann.judit@szte.hu; Tel.: +36-62-546453

## CONTENT

|                                                                                                                                      |   |
|--------------------------------------------------------------------------------------------------------------------------------------|---|
| Figure S1. $^1\text{H}$ NMR spectrum of compound <b>1</b> (500 MHz, $\text{CDCl}_3$ ) .....                                          | 2 |
| Figure S2. $^{13}\text{C}$ NMR JMOD spectrum of compound <b>1</b> (125 MHz, $\text{CDCl}_3$ ) .....                                  | 2 |
| Figure S3. $^1\text{H}$ NMR spectrum of compound <b>2</b> (500 MHz, $\text{CDCl}_3$ ) .....                                          | 3 |
| Figure S4. $^{13}\text{C}$ NMR JMOD spectrum of compound <b>2</b> (125 MHz, $\text{CDCl}_3$ ) .....                                  | 3 |
| Figure S5. $^1\text{H}$ - $^1\text{H}$ COSY spectrum of compound <b>2</b> (500 MHz, $\text{CDCl}_3$ ) .....                          | 4 |
| Figure S6. HSQC spectrum of compound <b>2</b> .....                                                                                  | 4 |
| Figure S7. HMBC spectrum of compound <b>2</b> .....                                                                                  | 5 |
| Figure S8. NOESY spectrum of compound <b>2</b> .....                                                                                 | 5 |
| Figure S9. $^1\text{H}$ NMR spectrum of compound <b>3</b> (500 MHz, $\text{CDCl}_3$ ).....                                           | 6 |
| Figure S10. $^{13}\text{C}$ NMR JMOD spectrum of compound <b>3</b> (125 MHz, $\text{CDCl}_3$ ).....                                  | 6 |
| Figure S11. $^1\text{H}$ NMR spectrum of compound <b>4</b> ( $\text{CDCl}_3$ , 500 MHz).....                                         | 7 |
| Figure S12. $^{13}\text{C}$ NMR JMOD spectrum of compound <b>4</b> ( $\text{CDCl}_3$ , 125 MHz).....                                 | 7 |
| Table S1. Antimicrobial activities of the fractions at a concentration of 50 $\mu\text{g/mL}$ by the agar disk diffusion method..... | 8 |

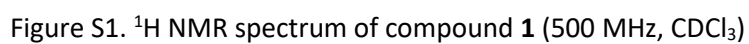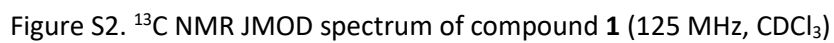

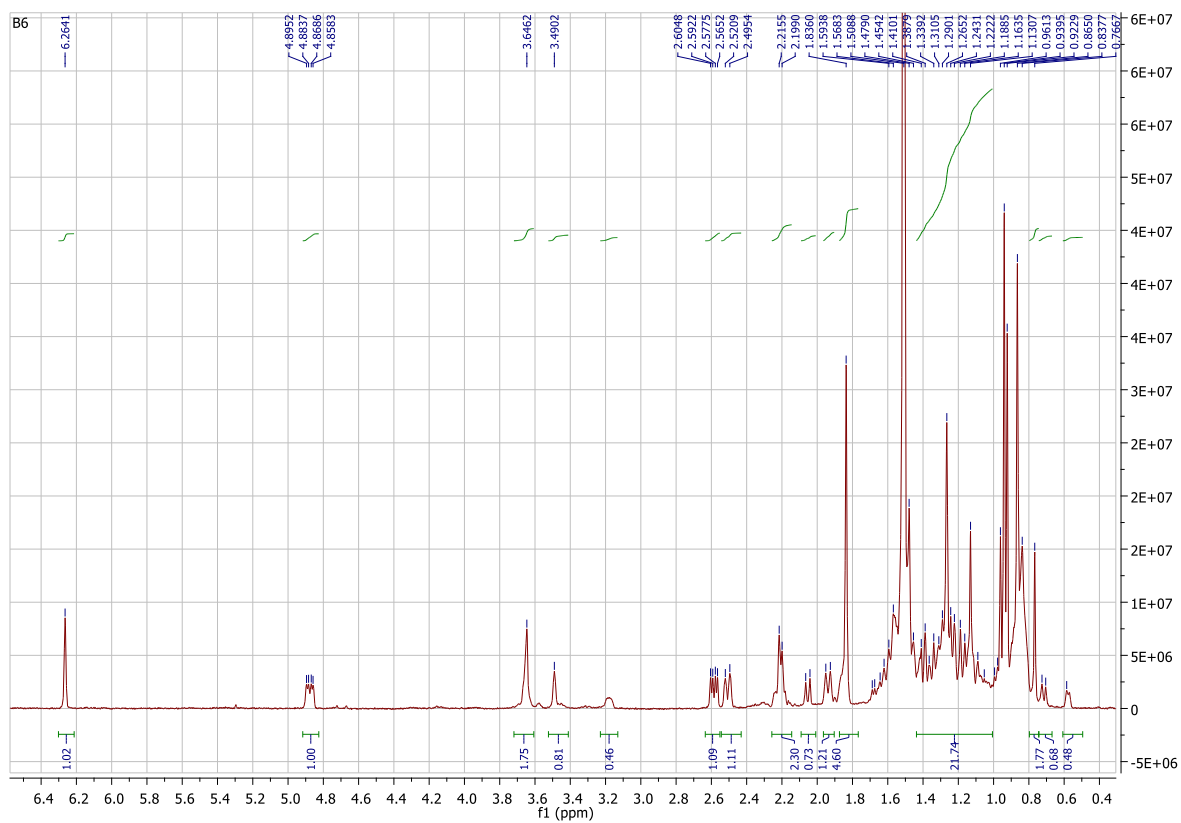

Figure S3.  $^1\text{H}$  NMR spectrum of compound **2** (500 MHz,  $\text{CDCl}_3$ )

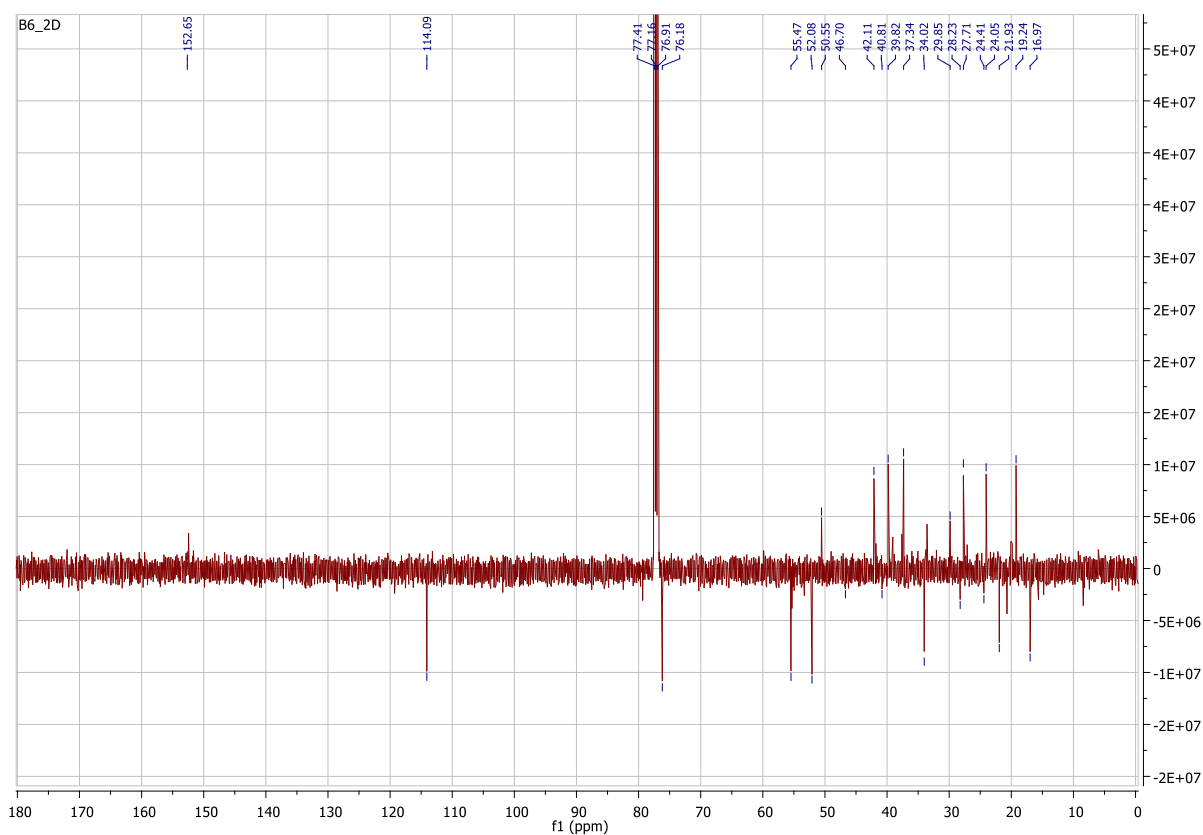

Figure S4.  $^{13}\text{C}$  NMR JMOD spectrum of compound **2** (125 MHz,  $\text{CDCl}_3$ )

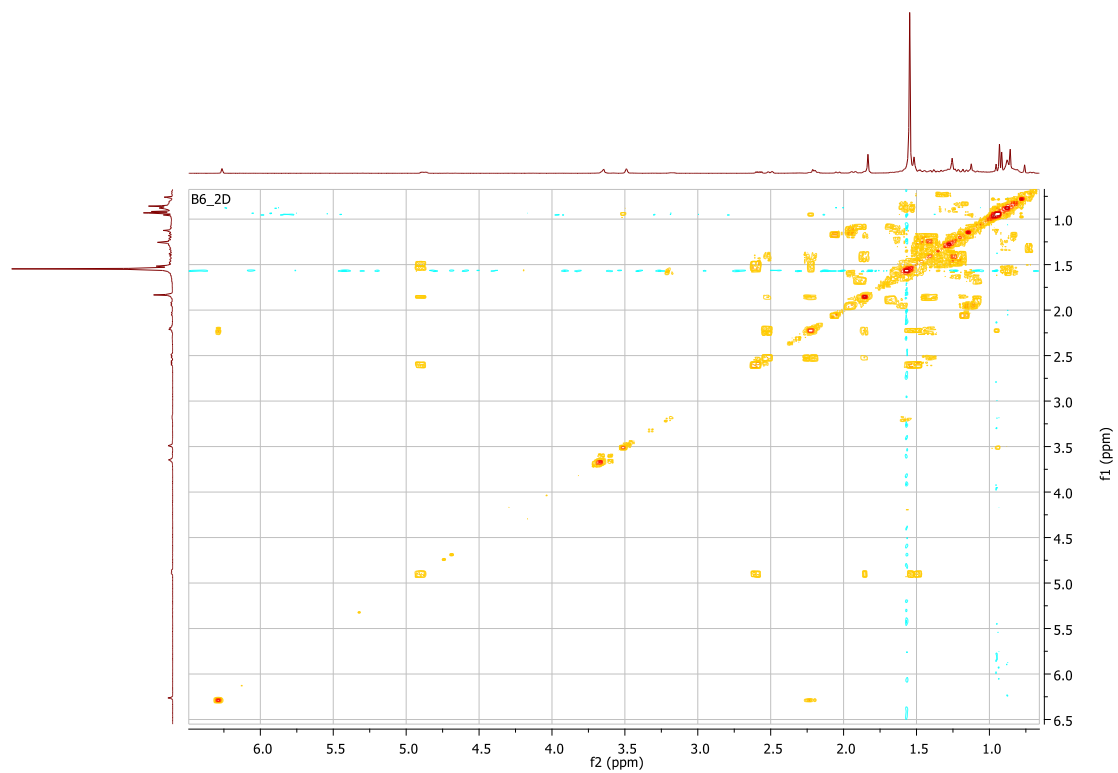

Figure S5.  $^1\text{H}$ - $^1\text{H}$  COSY spectrum of compound **2** (500 MHz,  $\text{CDCl}_3$ )

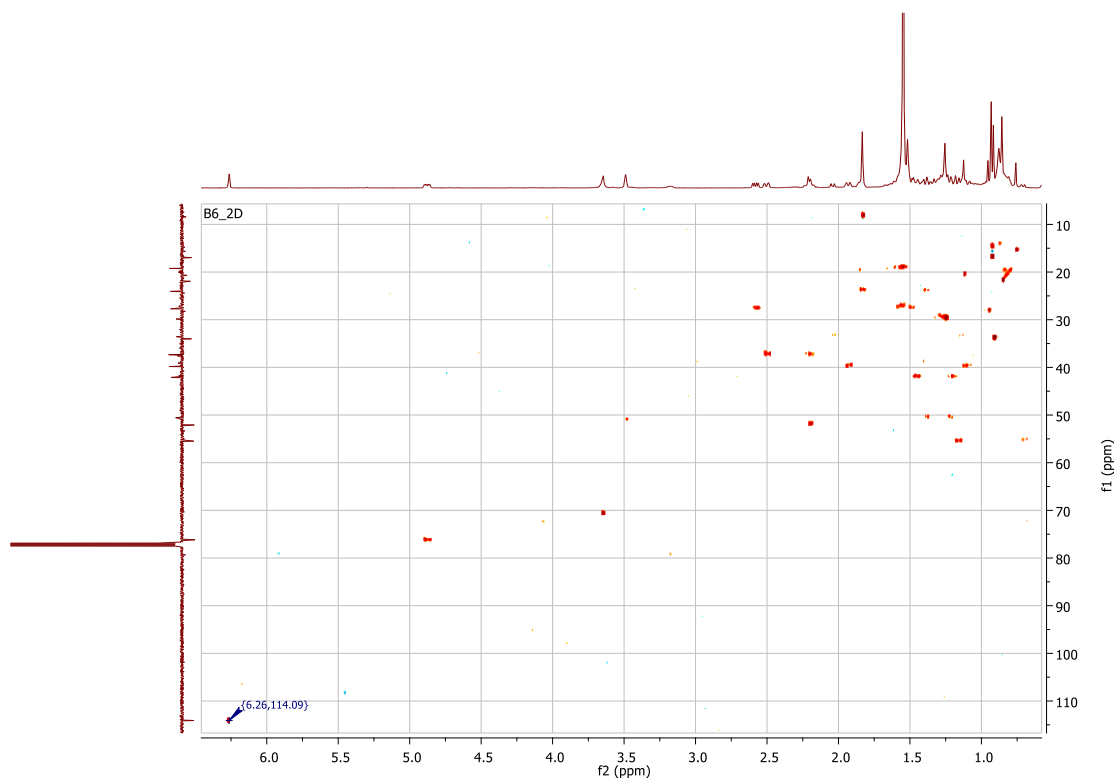

Figure S6. HSQC spectrum of compound **2**

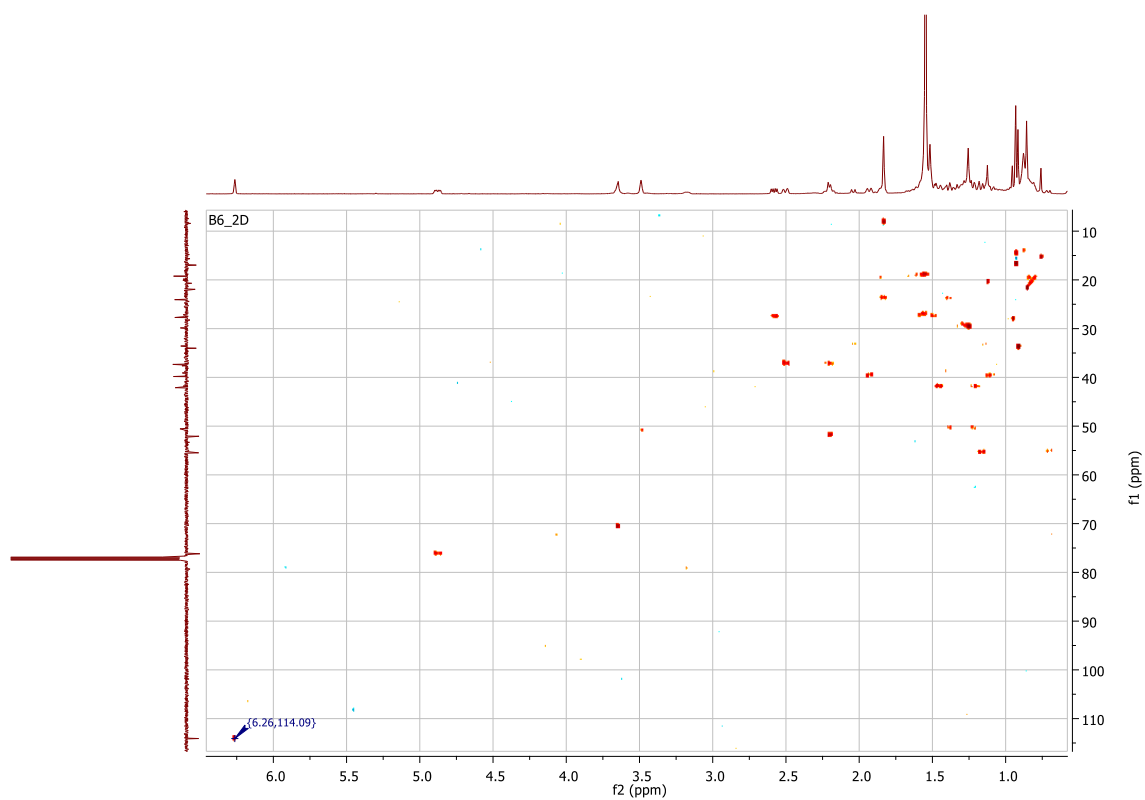

Figure S7. HMBC spectrum of compound **2**

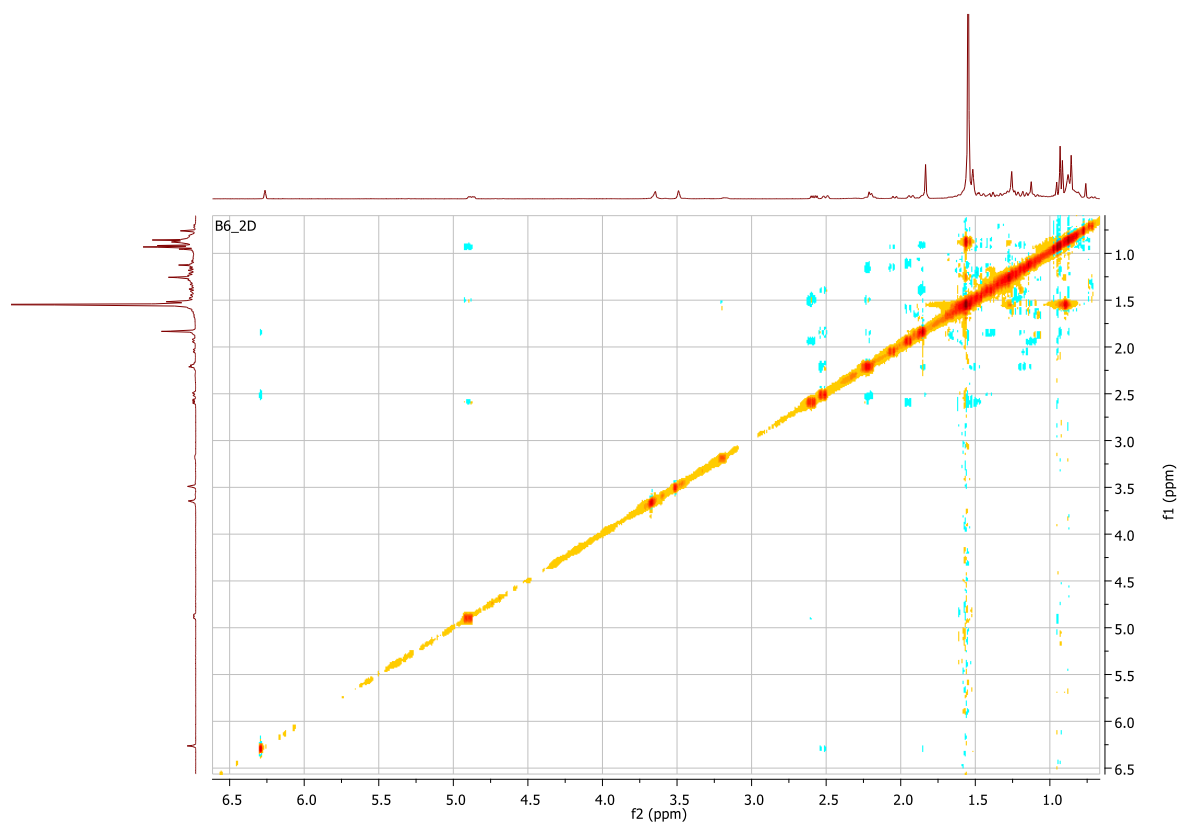

Figure S8. NOESY spectrum of compound **2**

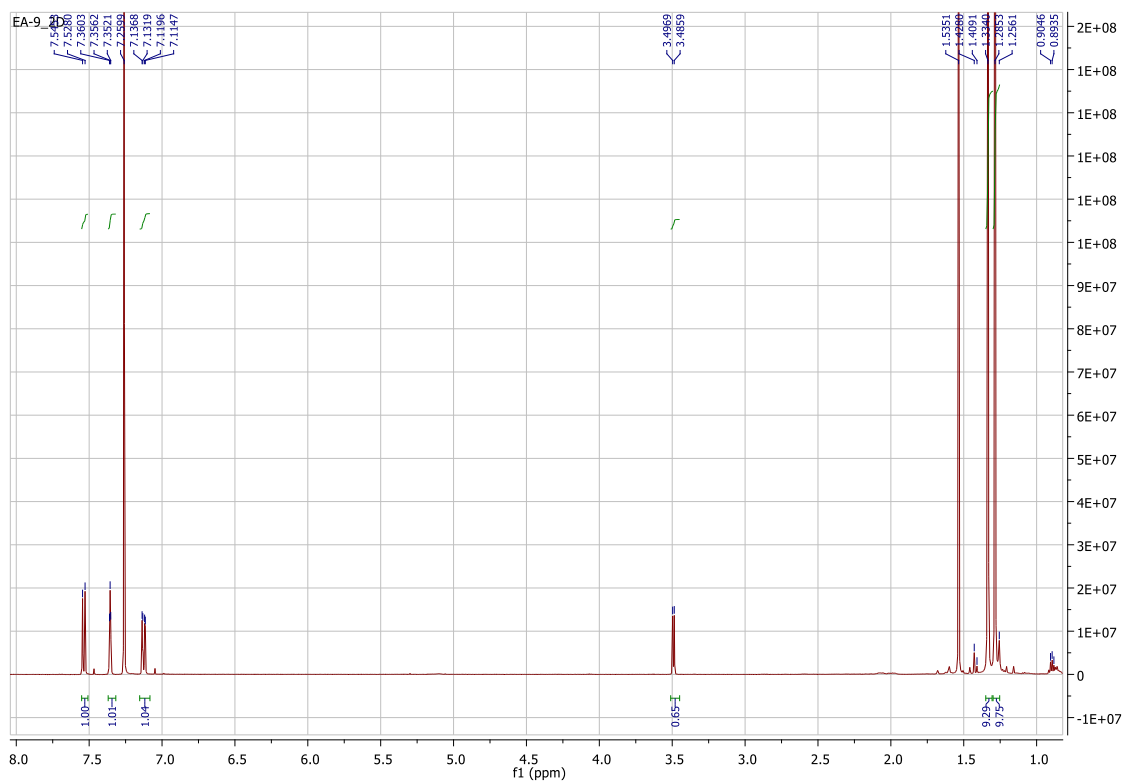

Figure S9.  $^1\text{H}$  NMR spectrum of compound **3** (500 MHz,  $\text{CDCl}_3$ )

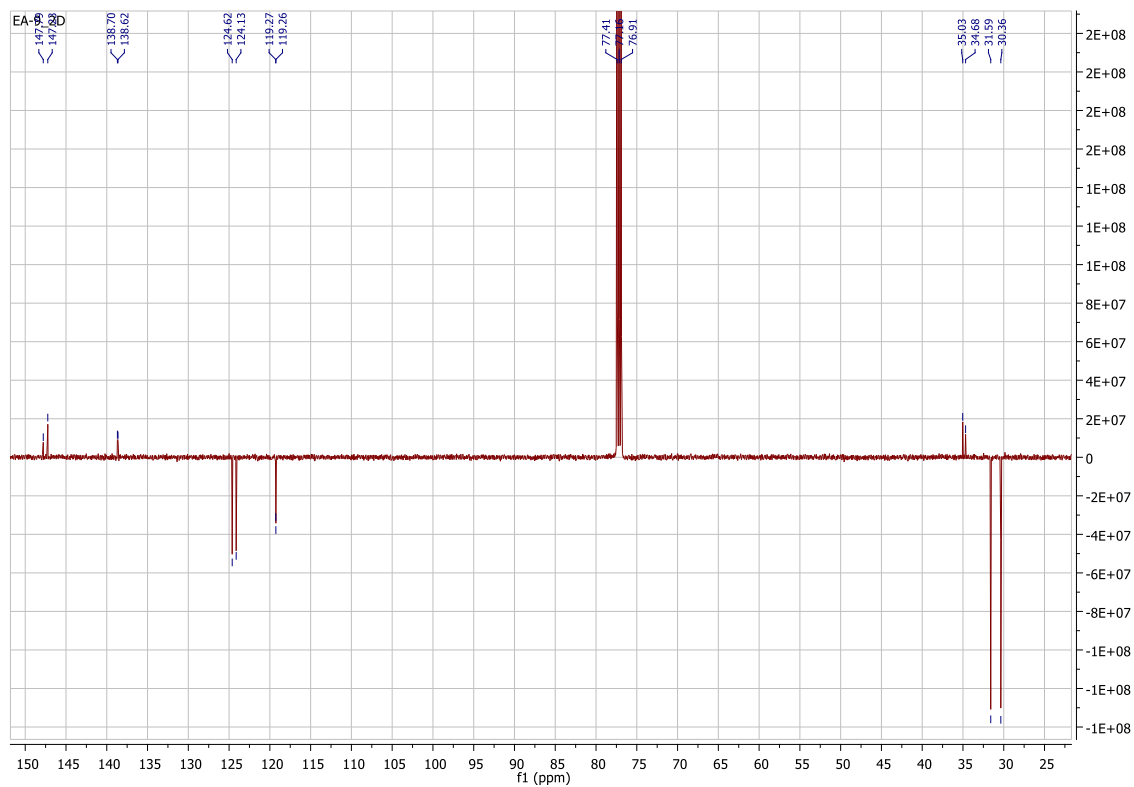

Figure S10.  $^{13}\text{C}$  NMR JMOD spectrum of compound **3** (125 MHz,  $\text{CDCl}_3$ )

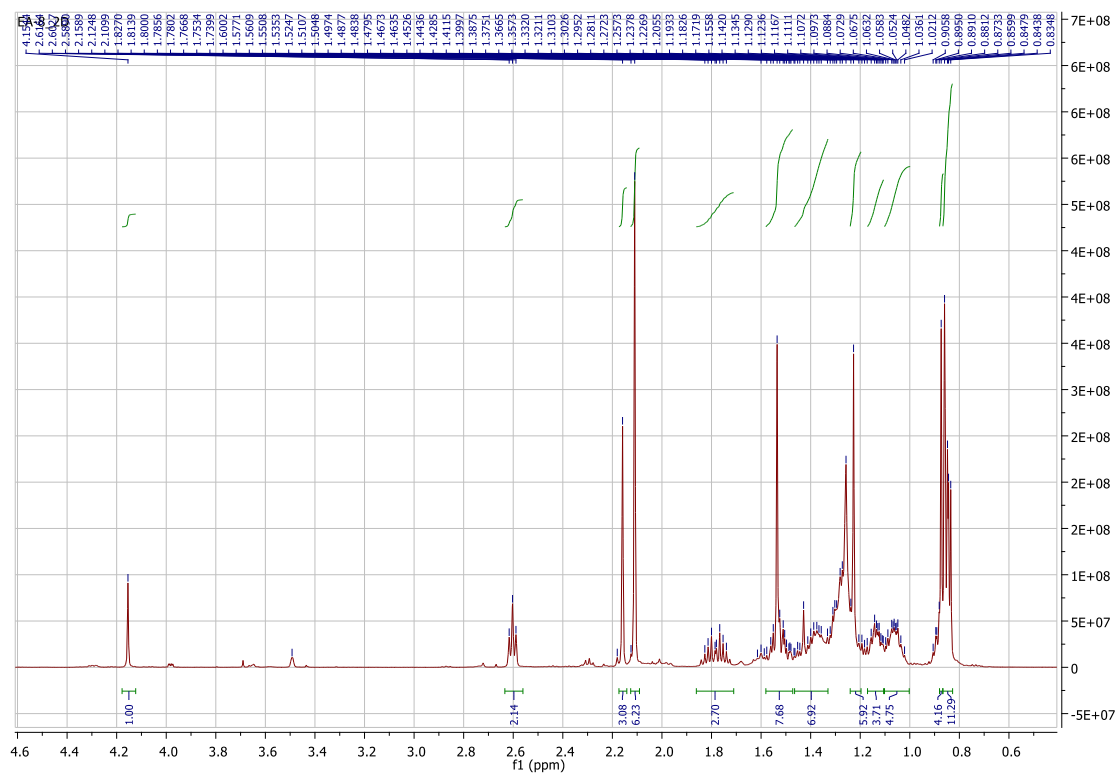

Figure S11.  $^1\text{H}$  NMR spectrum of compound **4** ( $\text{CDCl}_3$ , 500 MHz)

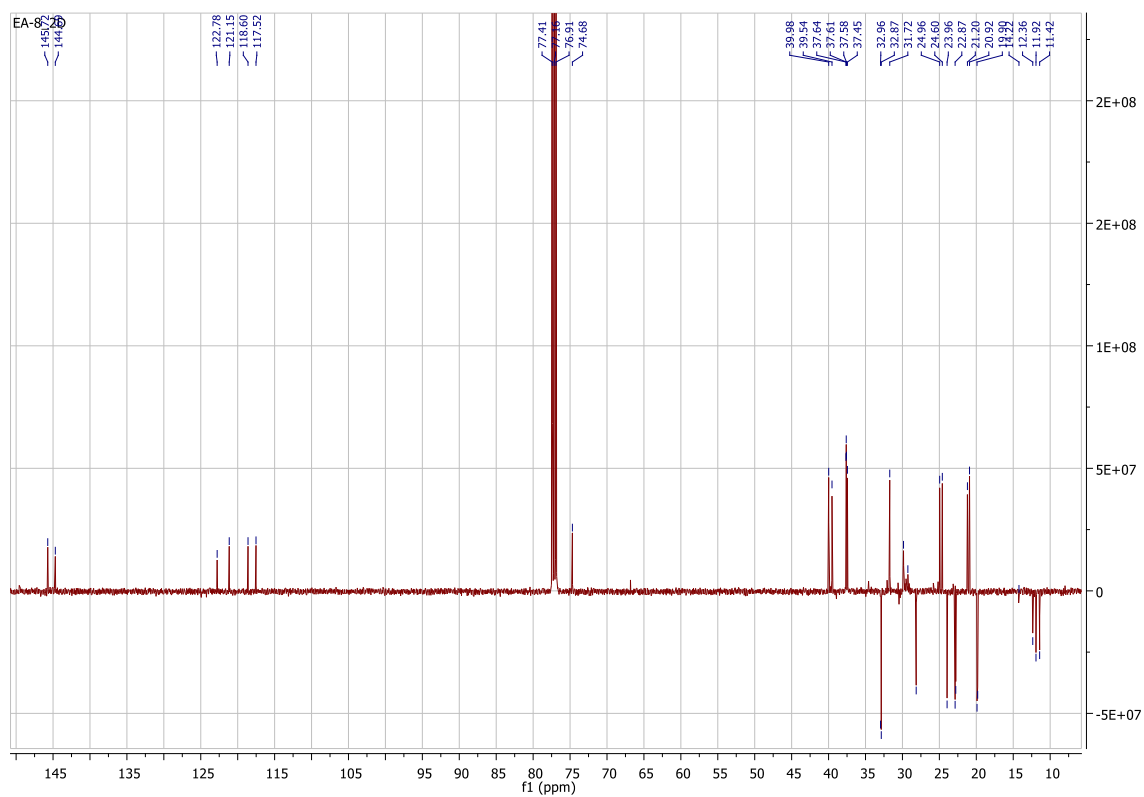

Figure S12.  $^{13}\text{C}$  NMR JMOD spectrum of compound **4** ( $\text{CDCl}_3$ , 125 MHz)



**Table S1.** Antimicrobial activities of the fractions at a concentration of 50 µg/mL by the agar disk diffusion method.

| Plant                        | Extract | Zone of inhibition (mm) <sup>a</sup> |                        |                                  |                               |                               |                                 |                              |                           |                            |                                 |                                  |                                   |                              |                               |                               |
|------------------------------|---------|--------------------------------------|------------------------|----------------------------------|-------------------------------|-------------------------------|---------------------------------|------------------------------|---------------------------|----------------------------|---------------------------------|----------------------------------|-----------------------------------|------------------------------|-------------------------------|-------------------------------|
|                              |         | Gram-positive bacteria               |                        |                                  |                               |                               |                                 |                              | Gram-negative bacteria    |                            |                                 |                                  | Fungi                             |                              |                               |                               |
|                              |         | <i>S. aureus</i> ATCC 29213          | <i>MRSA</i> ATCC 43300 | <i>S. epidermidis</i> ATCC 12228 | <i>E. faecalis</i> ATCC 29212 | <i>S. pyogenes</i> ATCC 19615 | <i>S. agalactiae</i> ATCC 13813 | <i>B. subtilis</i> ATCC 6633 | <i>E. coli</i> ATCC 35218 | <i>E. coli</i> K-12 AG-100 | <i>P. aeruginosa</i> ATCC 27853 | <i>M. catarrhalis</i> ATCC 25238 | <i>C. parapsilosis</i> ATCC 22019 | <i>N. glabrata</i> ATCC 2001 | <i>C. tropicalis</i> ATCC 750 | <i>C. albicans</i> ATCC 10231 |
| <i>Macaranga tanarius</i>    | H       | 9±0.0                                | 9±0.0                  | 11±0.0                           | N                             | N                             | 8±0.0                           | 10±0.0                       | N                         | N                          | N                               | 9±0.6                            | N                                 | N                            | N                             | N                             |
|                              | C       | 13±0.0                               | 13±0.2                 | 16±0.0                           | 11±0.0                        | 9±0.0                         | 8±0.4                           | 13±0.0                       | N                         | 7±0.0                      | N                               | 10±0.0                           | N                                 | N                            | 7±0.0                         | 8±0.0                         |
|                              | E       | 15±0.0                               | 15±0.0                 | 15±0.0                           | N                             | 5.3±4.6                       | N                               | 7±0.0                        | N                         | N                          | N                               | 18±0.3                           | 20±0.0                            | 17±0.0                       | 7±0.0                         | 8±0.6                         |
|                              | MW      | 10±0.0                               | N                      | 13±0.0                           | N                             | N                             | N                               | N                            | N                         | N                          | N                               | 13±0.0                           | N                                 | N                            | N                             | N                             |
| <i>Mallotus mollissimus</i>  | H       | 11±0.0                               | 10±0.0                 | N                                | N                             | 7±0.0                         | 7±0.0                           | 12±0.0                       | N                         | N                          | N                               | 8±0.0                            | 7±0.0                             | 7±0.0                        | 7±0.0                         | 7±0.0                         |
|                              | C       | 8±0.0                                | 9±0.1                  | N                                | N                             | 10±0.0                        | 7±0.0                           | 9±0.0                        | N                         | N                          | N                               | 8±0.0                            | N                                 | 15±0.1                       | N                             | N                             |
|                              | E       | 7±0.0                                | N                      | N                                | N                             | 9±0.0                         | N                               | N                            | N                         | N                          | N                               | N                                | N                                 | 20±0.0                       | N                             | N                             |
|                              | MW      | 9±0.0                                | N                      | 9±0.0                            | N                             | N                             | N                               | N                            | N                         | N                          | N                               | 8±0.1                            | N                                 | N                            | N                             | N                             |
| <i>Homalanthus giganteus</i> | H       | N                                    | N                      | N                                | N                             | N                             | N                               | N                            | N                         | N                          | N                               | N                                | N                                 | 14±0.0                       | N                             | N                             |
|                              | C       | N                                    | N                      | N                                | N                             | N                             | N                               | 7±0.0                        | N                         | N                          | N                               | 7±0.0                            | N                                 | 13±0.0                       | N                             | N                             |
|                              | E       | 15±0.0                               | 15±0.4                 | 15±0.0                           | 8±0.0                         | 7±0.1                         | N                               | 8±0.0                        | N                         | N                          | N                               | 16±0.0                           | 18±0.0                            | 25±0.0                       | N                             | N                             |
|                              | MW      | N                                    | N                      | 9±0.0                            | N                             | N                             | N                               | N                            | N                         | N                          | N                               | 9±0.0                            | N                                 | 18±0.0                       | N                             | N                             |
| <i>Mallotus rufidulus</i>    | H       | 10±0.0                               | 13±0.0                 | 8±0.0                            | N                             | N                             | N                               | 11±0.0                       | N                         | N                          | N                               | 9±0.0                            | N                                 | N                            | N                             | N                             |
|                              | C       | 13±0.0                               | 12.6±1.2               | 10±0.3                           | N                             | 10±0.0                        | N                               | 16±0.0                       | N                         | N                          | N                               | 10±0.0                           | N                                 | N                            | N                             | N                             |
|                              | E       | 9±0.0                                | 10±0.0                 | 10±0.0                           | N                             | N                             | N                               | 8±0.0                        | N                         | N                          | N                               | 10±0.0                           | N                                 | 18±0.0                       | 8±0.0                         | N                             |
|                              | MW      | N                                    | N                      | N                                | N                             | N                             | N                               | N                            | N                         | N                          | N                               | N                                | N                                 | N                            | N                             | N                             |

|                                |    |        |        |        |        |        |        |        |        |        |        |               |               |               |        |        |
|--------------------------------|----|--------|--------|--------|--------|--------|--------|--------|--------|--------|--------|---------------|---------------|---------------|--------|--------|
| <i>Shirakiopsis indica</i>     | H  | N      | N      | 7±0.0  | N      | N      | N      | N      | N      | N      | N      | 7±0.0         | N             | <b>22±0.0</b> | N      | 8±0.0  |
|                                | C  | N      | N      | N      | N      | 8±0.0  | 7±0.0  | 8±0.0  | N      | N      | N      | 10±0.0        | N             | <b>30±0.2</b> | N      | N      |
|                                | E  | N      | N      | N      | N      | N      | N      | N      | N      | N      | N      | 12±0.0        | <b>23±0.0</b> | <b>33±0.0</b> | N      | N      |
|                                | MW | 12±0.0 | 12±0.2 | N      | N      | N      | N      | N      | N      | N      | N      | <b>15±0.0</b> | <b>17±0.0</b> | <b>22±0.0</b> | N      | N      |
| <i>Euphorbia atoto</i>         | H  | N      | N      | N      | N      | N      | N      | N      | N      | N      | N      | N             | N             | 12±0.0        | N      | N      |
|                                | C  | 8±0.0  | 7±0.0  | N      | N      | N      | N      | 7±0.0  | N      | N      | N      | N             | N             | N             | N      | N      |
|                                | E  | 8±0.0  | 8±0.0  | 7±0.6  | 7±0.0  | N      | 7±0.0  | 9±0.3  | N      | 7±0.0  | N      | 10±0.0        | N             | <b>20±0.0</b> | 7±0.0  | N      |
|                                | MW | 12±0.0 | 12±0.0 | 13±0.0 | N      | 7±0.0  | N      | N      | N      | N      | N      | 11±0.0        | <b>19±0.0</b> | <b>20±0.0</b> | N      | N      |
| <i>Euphorbia hypericifolia</i> | H  | N      | N      | N      | N      | N      | N      | N      | N      | N      | N      | N             | N             | 10.6±1.2      | N      | N      |
|                                | C  | 7±0.4  | N      | N      | N      | 7±0.0  | N      | 7±0.0  | N      | N      | N      | N             | N             | <b>19±0.0</b> | N      | N      |
|                                | E  | 10±0.2 | 12±0.0 | 9±0.3  | N      | N      | 7±0.0  | N      | N      | N      | N      | 13±0.0        | <b>24±0.0</b> | <b>28±0.0</b> | N      | 10±0.0 |
|                                | MW | 11±0.0 | N      | 14±0.0 | N      | N      | N      | N      | N      | N      | N      | 10±0.0        | N             | <b>26±0.0</b> | N      | N      |
| Ciprofloxacin (5 µg)           |    | 30±0.0 | 27±0.0 | 34±0.0 | 20±0.0 | 18±0.0 | 17±0.0 | 28±0.0 | 30±0.0 | 30±0.0 | 28±0.0 | 30            | N/A           | N/A           | N/A    | N/A    |
| Ampicillin (10 µg)             |    | 18±0.0 | 10±0.0 | 16±0.0 | 26±0.0 | 30±0.0 | 15±0.0 | 22±0.0 | 20±0.0 | 24±0.0 | N      | 34            | N/A           | N/A           | N/A    | N/A    |
| Nystatin (5 µg)                |    | N/A           | 20±0.2        | 21±0.0        | 24±0.0 | 20±0.0 |

<sup>a</sup> Values are means of triplicate (n = 3) ± standard deviations. N, no inhibition shown. N/A, not applicable.

H = *n*-hexane, C = chloroform, E = ethyl acetate, MW aqueous methanolic extract.
